# Supplementary material for: Is the MDS-UPDRS a Good Screening Tool for Detecting Sleep Problems and Daytime Sleepiness in Parkinson’s Disease?
Source: Hindawi journal article supplement (doi:10.1155/2014/806169), 2014-01-01
Supplement: f1 [file 806169.f1.pdf]

**Supplementary Table1. Tests of model effects for the generalized ordinal logistic models evaluating the sleep related problems item of MDS-UPDRS.**

| Tests of Model Effects |                 |    |      |
|------------------------|-----------------|----|------|
| Source                 | Type III        |    |      |
|                        | Wald Chi-Square | df | Sig. |
| PDSS_01                | 35,643          | 4  | ,000 |
| PDSS_02                | 25,506          | 4  | ,000 |
| PDSS_03                | 81,840          | 4  | ,000 |
| PDSS_04                | 1,580           | 4  | ,812 |
| PDSS_05                | 10,528          | 4  | ,032 |
| PDSS_06                | 2,532           | 4  | ,639 |
| PDSS_07                | 6,080           | 4  | ,193 |
| PDSS_08                | 7,001           | 4  | ,136 |
| PDSS_09                | 1,552           | 4  | ,817 |
| PDSS_10                | 2,917           | 4  | ,572 |
| PDSS_11                | 2,179           | 4  | ,703 |
| PDSS_12                | ,344            | 4  | ,987 |
| PDSS_13                | 5,135           | 4  | ,274 |
| PDSS_14                | 5,604           | 4  | ,231 |
| PDSS_15                | 2,961           | 4  | ,564 |

Dependent Variable: @1\_7

Model: (Threshold), PDSS\_01, PDSS\_02, PDSS\_03, PDSS\_04, PDSS\_05, PDSS\_06, PDSS\_07, PDSS\_08, PDSS\_09, PDSS\_10, PDSS\_11, PDSS\_12, PDSS\_13, PDSS\_14, PDSS\_15

**Supplementary Table 2. Model parameters for the generalized ordinal logistic models evaluating the sleep related problems item of MDS-UPDRS**

| Parameter Estimates |                |            |                              |        |                 |    |      |        |                                         |       |
|---------------------|----------------|------------|------------------------------|--------|-----------------|----|------|--------|-----------------------------------------|-------|
| Parameter           | B              | Std. Error | 95% Wald Confidence Interval |        | Hypothesis Test |    |      | Exp(B) | 95% Wald Confidence Interval for Exp(B) |       |
|                     |                |            | Lower                        | Upper  | Wald Chi-Square | df | Sig. |        | Lower                                   | Upper |
|                     |                |            | Threshold                    |        |                 |    |      |        |                                         |       |
| [@1_7=4]            | -8,190         | ,5659      | -9,299                       | -7,081 | 209,409         | 1  | ,000 | ,000   | 9,152E-005                              | ,001  |
| [@1_7=3]            | -4,938         | ,4625      | -5,844                       | -4,031 | 113,958         | 1  | ,000 | ,007   | ,003                                    | ,018  |
| [@1_7=2]            | -3,349         | ,4321      | -4,196                       | -2,502 | 60,081          | 1  | ,000 | ,035   | ,015                                    | ,082  |
| [@1_7=1]            | -1,504         | ,4009      | -2,290                       | -,718  | 14,078          | 1  | ,000 | ,222   | ,101                                    | ,488  |
| [PDSS_01=4]         | -1,695         | ,4604      | -2,597                       | -,793  | 13,556          | 1  | ,000 | ,184   | ,074                                    | ,453  |
| [PDSS_01=3]         | -2,059         | ,4069      | -2,857                       | -1,262 | 25,619          | 1  | ,000 | ,128   | ,057                                    | ,283  |
| [PDSS_01=2]         | -1,710         | ,3422      | -2,381                       | -1,040 | 24,989          | 1  | ,000 | ,181   | ,092                                    | ,354  |
| [PDSS_01=1]         | -,945          | ,2927      | -1,519                       | -,372  | 10,428          | 1  | ,001 | ,389   | ,219                                    | ,690  |
| [PDSS_01=0]         | 0 <sup>a</sup> | .          | .                            | .      | .               | .  | .    | 1      | .                                       | .     |
| [PDSS_02=4]         | -1,884         | ,5634      | -2,988                       | -,779  | 11,178          | 1  | ,001 | ,152   | ,050                                    | ,459  |
| [PDSS_02=3]         | -1,973         | ,4358      | -2,827                       | -1,119 | 20,494          | 1  | ,000 | ,139   | ,059                                    | ,327  |
| [PDSS_02=2]         | -,625          | ,3095      | -1,231                       | -,018  | 4,073           | 1  | ,044 | ,535   | ,292                                    | ,982  |
| [PDSS_02=1]         | -,621          | ,2978      | -1,205                       | -,038  | 4,355           | 1  | ,037 | ,537   | ,300                                    | ,963  |
| [PDSS_02=0]         | 0 <sup>a</sup> | .          | .                            | .      | .               | .  | .    | 1      | .                                       | .     |
| [PDSS_03=4]         | -3,362         | ,4168      | -4,179                       | -2,545 | 65,056          | 1  | ,000 | ,035   | ,015                                    | ,078  |
| [PDSS_03=3]         | -2,440         | ,3877      | -3,200                       | -1,680 | 39,606          | 1  | ,000 | ,087   | ,041                                    | ,186  |
| [PDSS_03=2]         | -2,025         | ,3289      | -2,670                       | -1,381 | 37,920          | 1  | ,000 | ,132   | ,069                                    | ,251  |
| [PDSS_03=1]         | -,843          | ,3250      | -1,480                       | -,207  | 6,736           | 1  | ,009 | ,430   | ,228                                    | ,813  |
| [PDSS_03=0]         | 0 <sup>a</sup> | .          | .                            | .      | .               | .  | .    | 1      | .                                       | .     |
| [PDSS_04=4]         | -,016          | ,6079      | -1,207                       | 1,176  | ,001            | 1  | ,979 | ,984   | ,299                                    | 3,241 |
| [PDSS_04=3]         | ,379           | ,4275      | -,459                        | 1,217  | ,786            | 1  | ,375 | 1,461  | ,632                                    | 3,377 |
| [PDSS_04=2]         | ,021           | ,3190      | -,605                        | ,646   | ,004            | 1  | ,948 | 1,021  | ,546                                    | 1,908 |
| [PDSS_04=1]         | -,170          | ,3177      | -,793                        | ,453   | ,286            | 1  | ,593 | ,844   | ,453                                    | 1,573 |
| [PDSS_04=0]         | 0 <sup>a</sup> | .          | .                            | .      | .               | .  | .    | 1      | .                                       | .     |
| [PDSS_05=4]         | -1,480         | ,6581      | -2,770                       | -,190  | 5,059           | 1  | ,024 | ,228   | ,063                                    | ,827  |
| [PDSS_05=3]         | -1,118         | ,4325      | -1,965                       | -,270  | 6,675           | 1  | ,010 | ,327   | ,140                                    | ,764  |
| [PDSS_05=2]         | -,509          | ,3304      | -1,156                       | ,139   | 2,371           | 1  | ,124 | ,601   | ,315                                    | 1,149 |
| [PDSS_05=1]         | ,058           | ,3149      | -,559                        | ,676   | ,034            | 1  | ,853 | 1,060  | ,572                                    | 1,965 |
| [PDSS_05=0]         | 0 <sup>a</sup> | .          | .                            | .      | .               | .  | .    | 1      | .                                       | .     |
| [PDSS_06=4]         | -,051          | ,7832      | -1,586                       | 1,484  | ,004            | 1  | ,948 | ,950   | ,205                                    | 4,411 |
| [PDSS_06=3]         | -,377          | ,5707      | -1,496                       | ,741   | ,437            | 1  | ,509 | ,686   | ,224                                    | 2,099 |
| [PDSS_06=2]         | ,015           | ,3013      | -,575                        | ,606   | ,003            | 1  | ,959 | 1,015  | ,563                                    | 1,833 |
| [PDSS_06=1]         | ,367           | ,2732      | -,168                        | ,903   | 1,807           | 1  | ,179 | 1,444  | ,845                                    | 2,466 |
| [PDSS_06=0]         | 0 <sup>a</sup> | .          | .                            | .      | .               | .  | .    | 1      | .                                       | .     |
| [PDSS_07=4]         | ,171           | 1,067<br>6 | -1,921                       | 2,264  | ,026            | 1  | ,873 | 1,187  | ,146                                    | 9,620 |
| [PDSS_07=3]         | -,992          | 1,011<br>9 | -2,975                       | ,991   | ,961            | 1  | ,327 | ,371   | ,051                                    | 2,694 |



Dependent Variable: @1\_7

Model: (Threshold), PDSS\_01, PDSS\_02, PDSS\_03, PDSS\_04, PDSS\_05, PDSS\_06, PDSS\_07, PDSS\_08, PDSS\_09, PDSS\_10, PDSS\_11, PDSS\_12, PDSS\_13, PDSS\_14, PDSS\_15

- a. Set to zero because this parameter is redundant.
- b. Fixed at the displayed value.

**Supplementary Table3. Tests of model effects for the generalized ordinal logistic models evaluating the daytime sleepiness item of MDS-UPDRS.**

**Tests of Model Effects**

| Source | Type III        |    |      |
|--------|-----------------|----|------|
|        | Wald Chi-Square | df | Sig. |
| ESS_01 | 10,106          | 3  | ,018 |
| ESS_02 | 24,574          | 3  | ,000 |
| ESS_03 | 8,747           | 3  | ,033 |
| ESS_04 | 5,247           | 3  | ,155 |
| ESS_05 | 4,032           | 3  | ,258 |
| ESS_06 | 2,729           | 2  | ,256 |
| ESS_07 | 8,683           | 3  | ,034 |
| ESS_08 | 5,084           | 3  | ,166 |

Dependent Variable: @1\_8

Model: (Threshold), ESS\_01, ESS\_02, ESS\_03,

ESS\_04, ESS\_05, ESS\_06, ESS\_07, ESS\_08



Dependent Variable: @1\_8

Model: (Threshold), ESS\_01, ESS\_02, ESS\_03, ESS\_04, ESS\_05, ESS\_06, ESS\_07, ESS\_08

a. Set to zero because this parameter is redundant.

b. Fixed at the displayed value.
